# Supplementary material for: Chiral induction in a novel self-assembled supramolecular system composed of α-cyclodextrin porous liquids, chiral silver nanoparticles and planar conjugated molecules
Source: Royal Society of Chemistry journal article supplement (doi:10.1039/d1sm01248g), 2021-12-21
Supplement: d1sm01248g1.pdf [file d1sm01248g1.pdf]

# Supporting Information

Chiral induction in a novel self-assembled supramolecular system composed of  $\alpha$ -cyclodextrin porous liquids, chiral silver nanoparticles and planar conjugated molecules

Yan Wang<sup>a,c</sup>, Zhen Feng<sup>a,b</sup>, Yawei Sun<sup>a</sup>, Lijun Zhu<sup>a,b</sup>, Daohong Xia<sup>a,b\*</sup>

<sup>a</sup>College of Chemical Engineering, <sup>b</sup>State Key Laboratory of Heavy Oil Processing, China University of Petroleum (East China), Qingdao 266580, China, <sup>c</sup>Oil & Gas Technology Research Institute, CNPC Changqing Oilfield Company, Xi'an 710018, China

\*E-mail: xiadh@upc.edu.cn (D. Xia)

## Table of Contents

- I.  $^1\text{H}$  NMR spectra of Azo-Ag NPs
- II. UV-vis and CD spectra of indigo carmine
- III. CD spectra of supramolecular systems
- IV. Effect of pH on the chiral induction of the supramolecular system composed of indigo carmine,  $\alpha$ -CDPL and Azo-Ag NPs
- V. Effect of temperature and NaCl concentrations on the chiral induction of the supramolecular system containing  $\alpha$ -CDPL, Azo-Ag NPs and indigo carmine
- VI. CD spectrum of the mixture solution and experiment data of the inclusion complex of  $\alpha$ -CD and 4-aminoazobenzene
- VII. CD and UV-vis spectra of the supramolecular systems composed of CDPL-Ag NPs (or CDPL) and MB (or IC)
- VIII.  $^1\text{H}$  NMR spectra of  $\alpha$ -CDPL and the inclusion complex of  $\alpha$ -CDPL with 4-aminoazobenzene
- IX. UV-vis spectra of the supramolecular system containing Azo-Ag NPs,  $\alpha$ -CDPL and MB or IC
- X. The stretching frequencies of C=O and -OH groups in CDPLs and CDPL-Ag NPs

## I. $^1\text{H}$ NMR spectra of Azo-Ag NPs

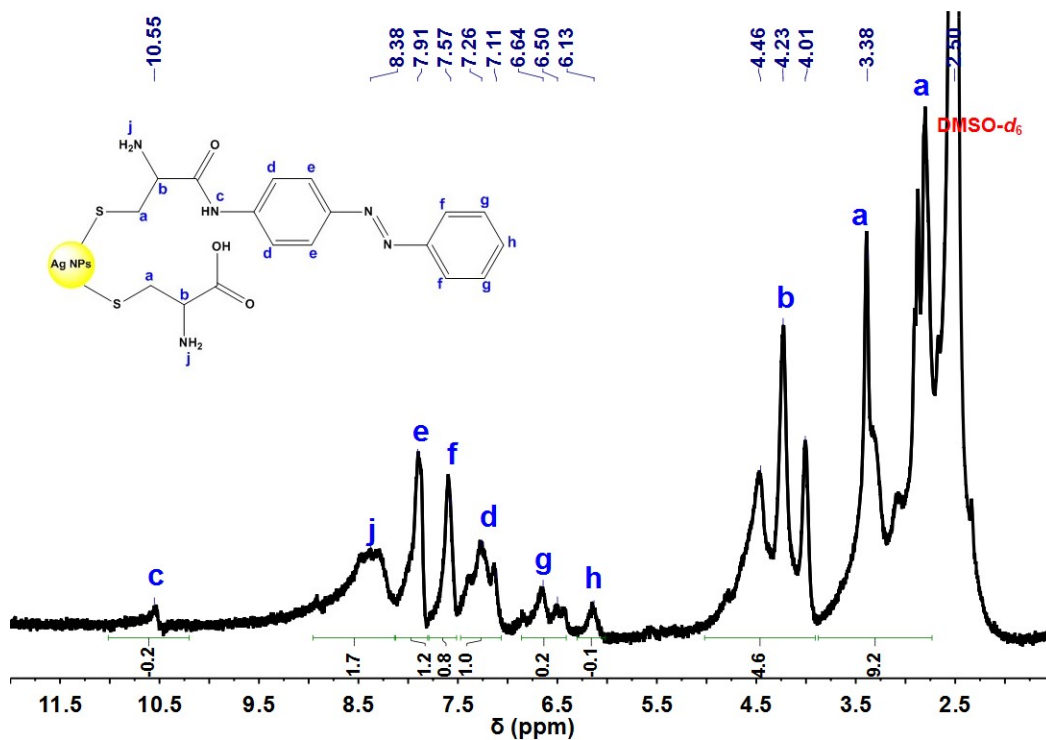

Figure S1  $^1\text{H}$  NMR spectra of Azo-Ag NPs

## II. UV-vis and CD spectra of indigo carmine

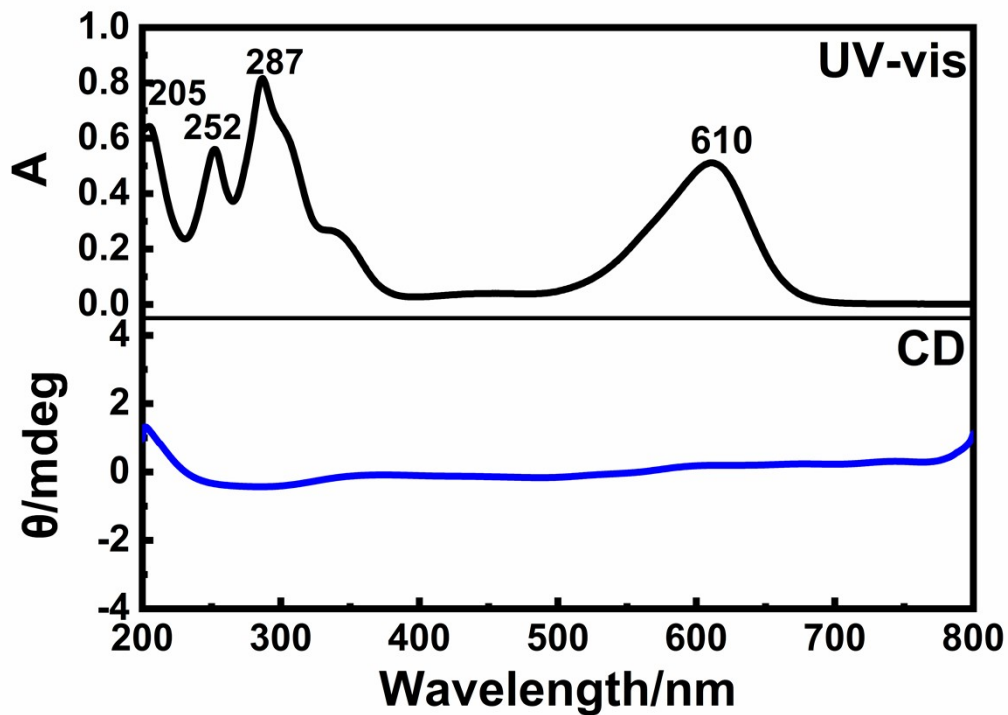

Figure S2 UV-vis and CD spectra of indigo carmine

### III. CD spectra of supramolecular systems

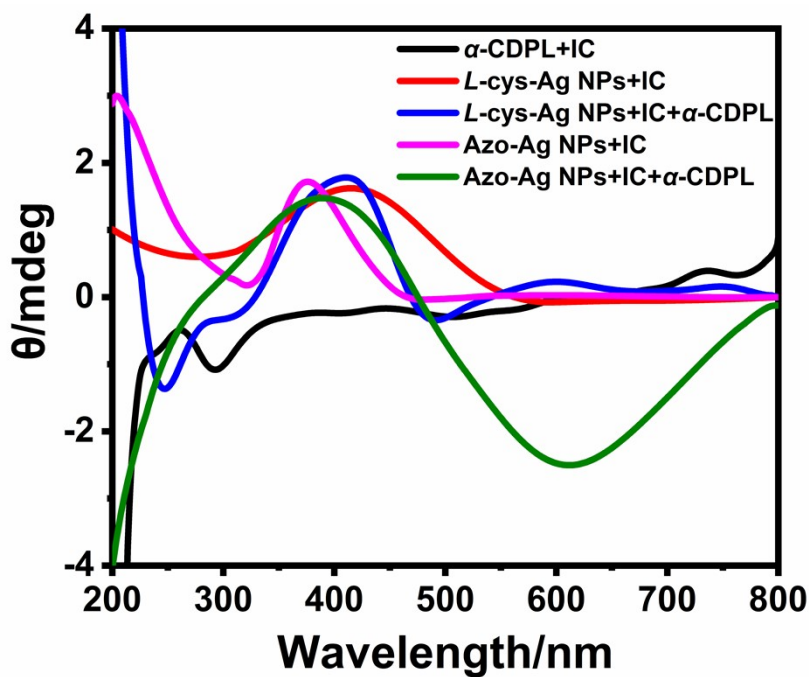

Figure S3 CD spectra of supramolecular systems

### IV. Effect of pH on the chiral induction of the supramolecular system composed of indigo carmine, $\alpha$ -CDPL and Azo-Ag NPs

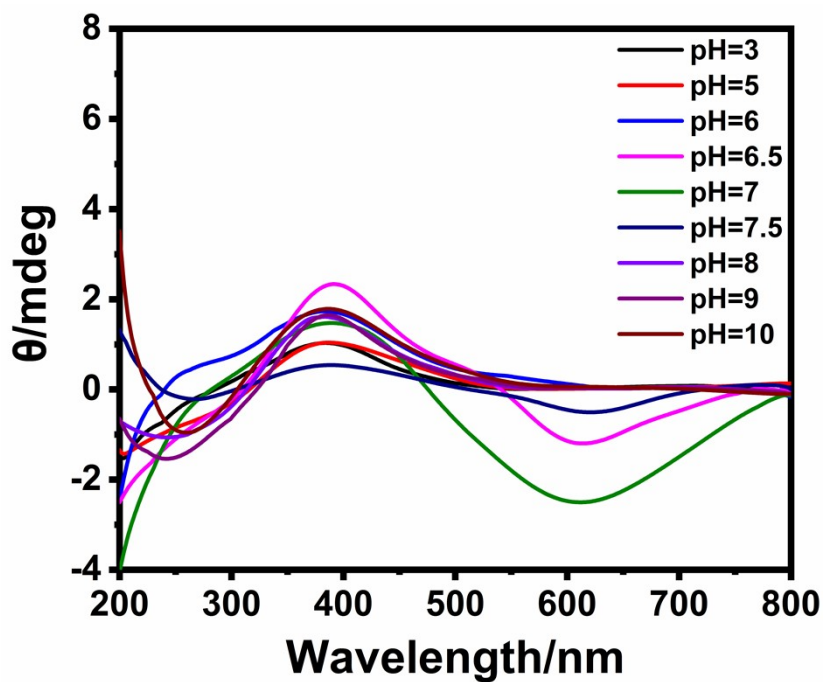

Figure S4 Effect of pH on the chiral induction of the supramolecular system composed of indigo carmine,  $\alpha$ -CDPL and Azo-Ag NPs

V. Effect of temperature and NaCl concentrations on the chiral induction of the supramolecular system containing  $\alpha$ -CDPL, Azo-Ag NPs and indigo carmine

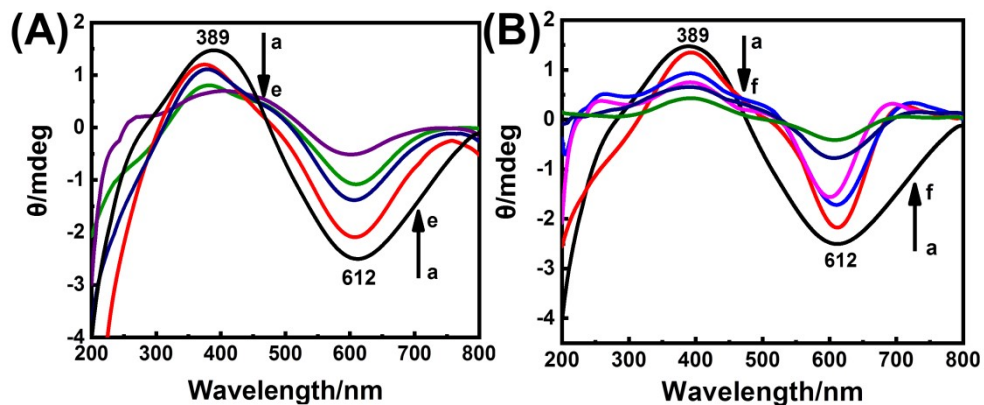

Figure S5 (A) Effect of temperature on the chiral induction of the supramolecular system containing  $\alpha$ -CDPL, Azo-Ag NPs and indigo carmine (a→e: 25 °C, 35 °C, 45 °C, 55 °C and 65 °C); (B) Circular dichroism spectra of  $\alpha$ -CDPL, Azo-Ag NPs and indigo carmine under different NaCl concentrations (a→f: 0, 0.02, 0.04, 0.06, 0.10, and 0.14 mol·L<sup>-1</sup>).

VI. CD spectrum of the mixture solution and experiment data of the inclusion complex of  $\alpha$ -CD and 4-aminoazobenzene

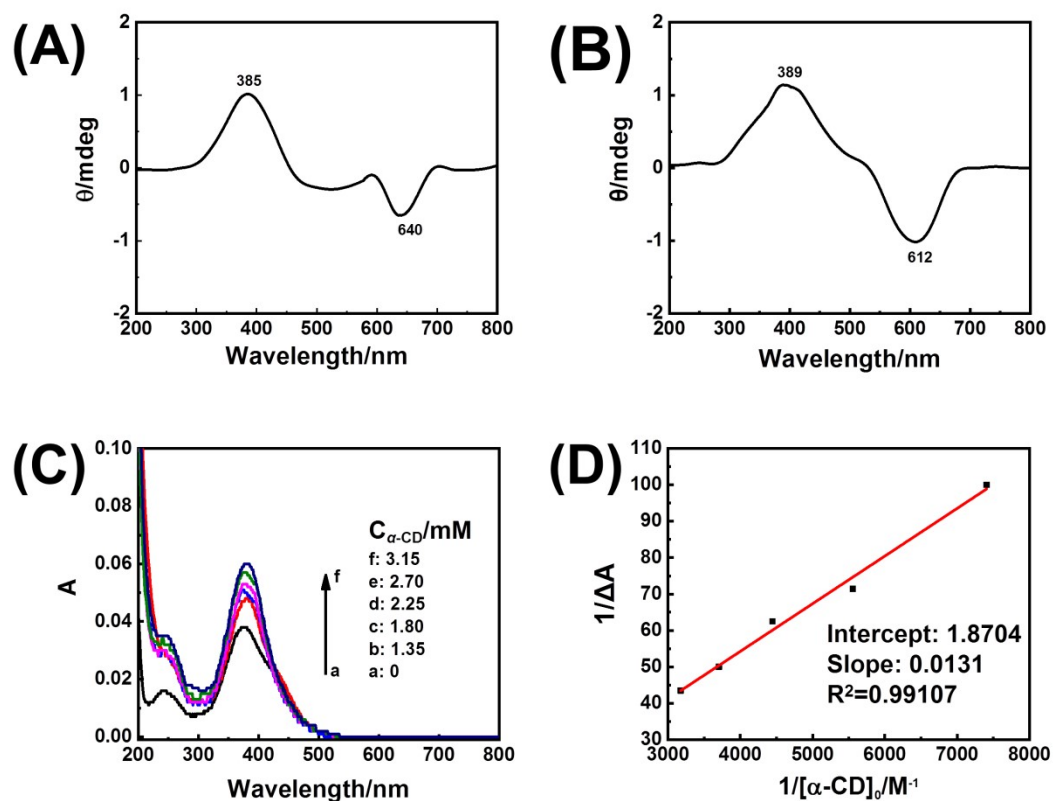

Figure S6 CD spectrum of the mixture solution of Azo-Ag NPs,  $\alpha$ -CD and methylene blue (A) or indigo carmine (B); (C) UV-vis spectra of the mixture solution of 4-aminoazobenzene and  $\alpha$ -CD with different concentrations; (D) relationship between  $1/\Delta A$  and  $1/[\alpha\text{-CD}]_0$  in the inclusion complex of  $\alpha$ -CD and 4-aminoazobenzene.

VII. CD and UV-vis spectra of the supramolecular systems composed of CDPL-Ag NPs (or CDPL) and MB (or IC)

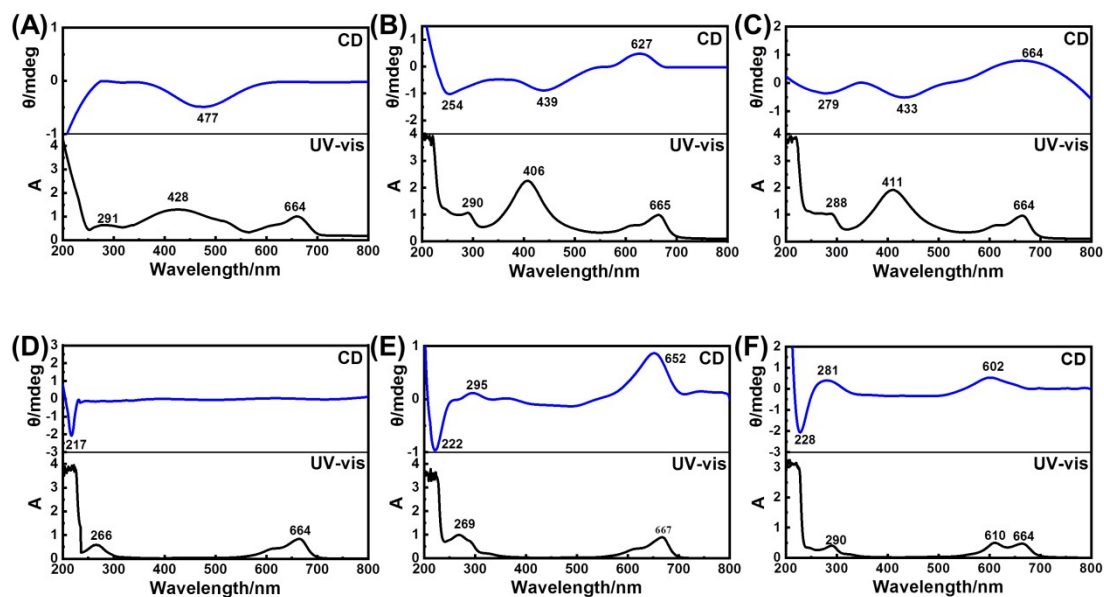

Figure S7 CD and UV-vis spectra of supramolecular systems (A,  $\alpha$ -CDPL-Ag NPs+MB, B,  $\beta$ -CDPL-Ag NPs+MB, C,  $\gamma$ -CDPL-Ag NPs+MB, D,  $\alpha$ -CDPL+MB, E,  $\beta$ -CDPL+MB and F,  $\gamma$ -CDPL+MB)

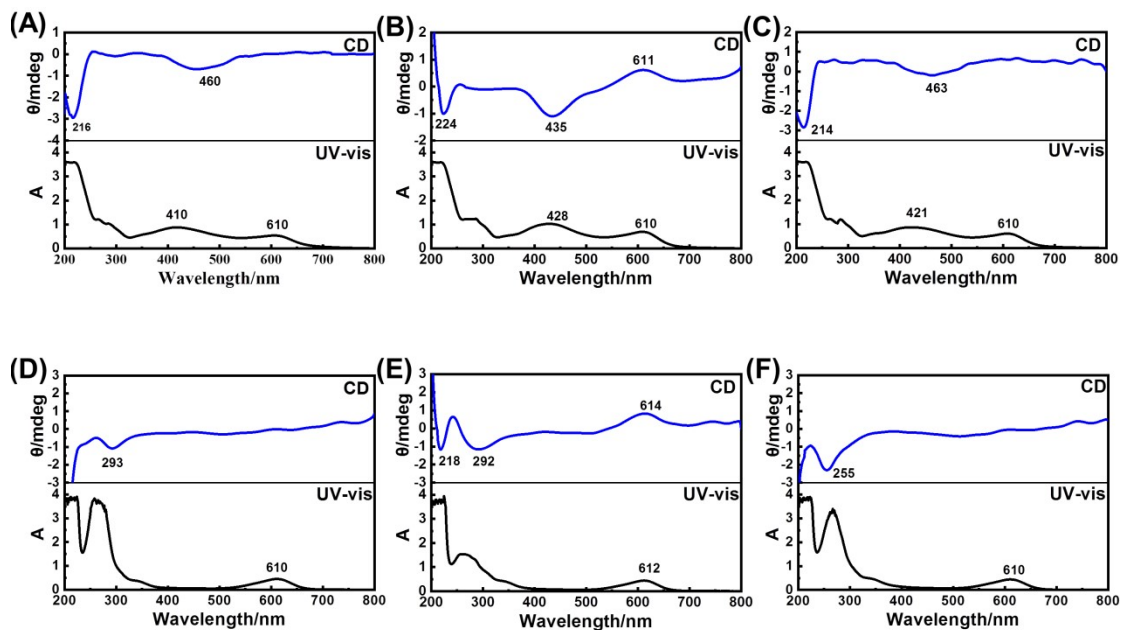

Figure S8 CD and UV-vis spectra of supramolecular systems (A,  $\alpha$ -CDPL-Ag NPs+IC, B,  $\beta$ -CDPL-Ag NPs+IC, C,  $\gamma$ -CDPL-Ag NPs+IC, D,  $\alpha$ -CDPL+IC, E,  $\beta$ -CDPL+IC and F,  $\gamma$ -CDPL+IC)

VIII.  $^1\text{H}$  NMR spectra of  $\alpha$ -CDPL and the inclusion complex of  $\alpha$ -CDPL with 4-aminoazobenzene

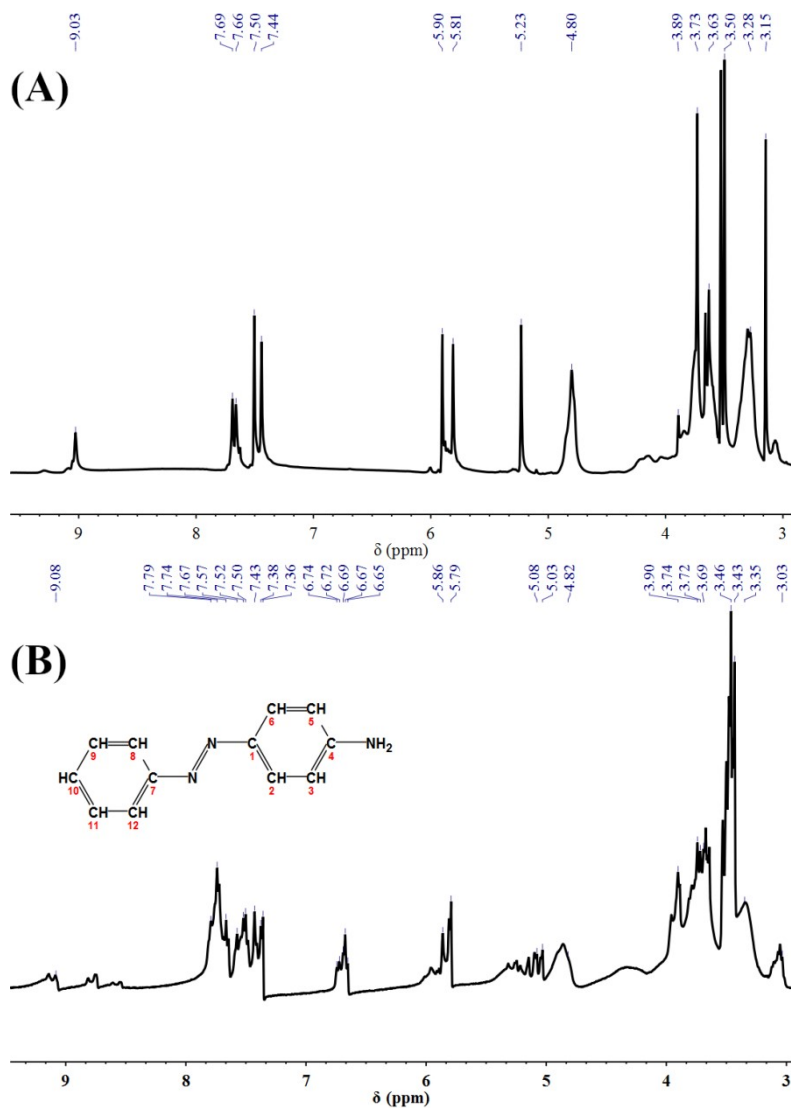

Figure S9  $^1\text{H}$  NMR spectra of  $\alpha$ -CDPL (A) and the inclusion complex of  $\alpha$ -CDPL with 4-aminoazobenzene (B);



IX. UV-vis spectra of the supramolecular system containing Azo-Ag NPs,  $\alpha$ -CDPL and MB or IC

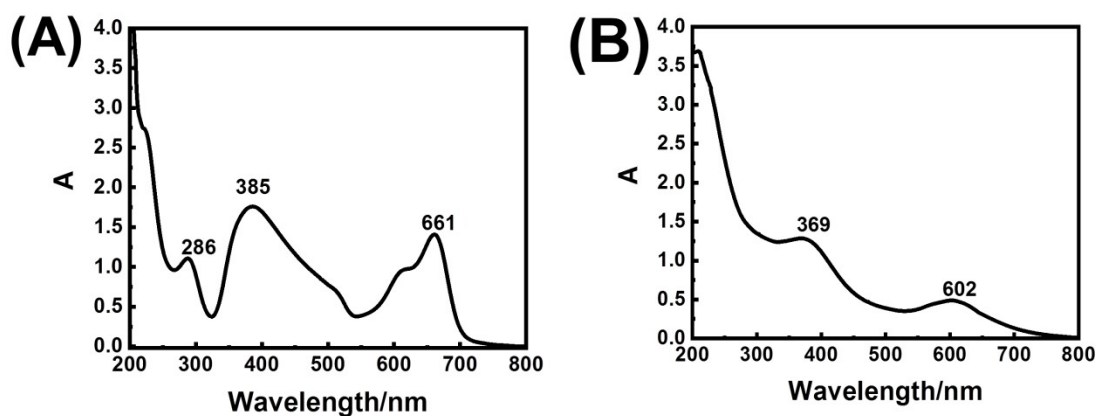

Figure S10 UV-vis spectra of the supramolecular system containing Azo-Ag NPs,  $\alpha$ -CDPL and MB or IC ((A) Azo-Ag NPs+ $\alpha$ -CDPL+MB and (B) Azo-Ag NPs+ $\alpha$ -CDPL+IC)

X. The stretching frequencies of C=O and -OH groups in CDPLs and CDPL-Ag NPs

Table S1 The stretching frequencies of C=O and -OH groups in CDPLs and CDPL-Ag NPs

| groups               | $\alpha$ -CDPL | $\alpha$ -CDPL-Ag NPs | $\beta$ -CDPL | $\beta$ -CDPL-Ag NPs | $\gamma$ -CDPL | $\gamma$ -CDPL-Ag NPs |
|----------------------|----------------|-----------------------|---------------|----------------------|----------------|-----------------------|
| C=O/cm <sup>-1</sup> | 1755           | 1747                  | 1755          | 1745                 | 1756           | 1749                  |
| -OH/cm <sup>-1</sup> | 3418           | 3427                  | 3378          | 3429                 | 3376           | 3435                  |
